# Supplementary material for: Emergency Department Recognition of Mental Disorders and Short-Term Outcome of Deliberate Self-Harm
Source: Atypon-hosted journal article supplement (doi:10.1176/appi.ajp.2013.12121506), 2013-07-30

**FIGURE 1. Flow Chart of Selection of Emergency Department Visits for Deliberate Self-Harm Events**

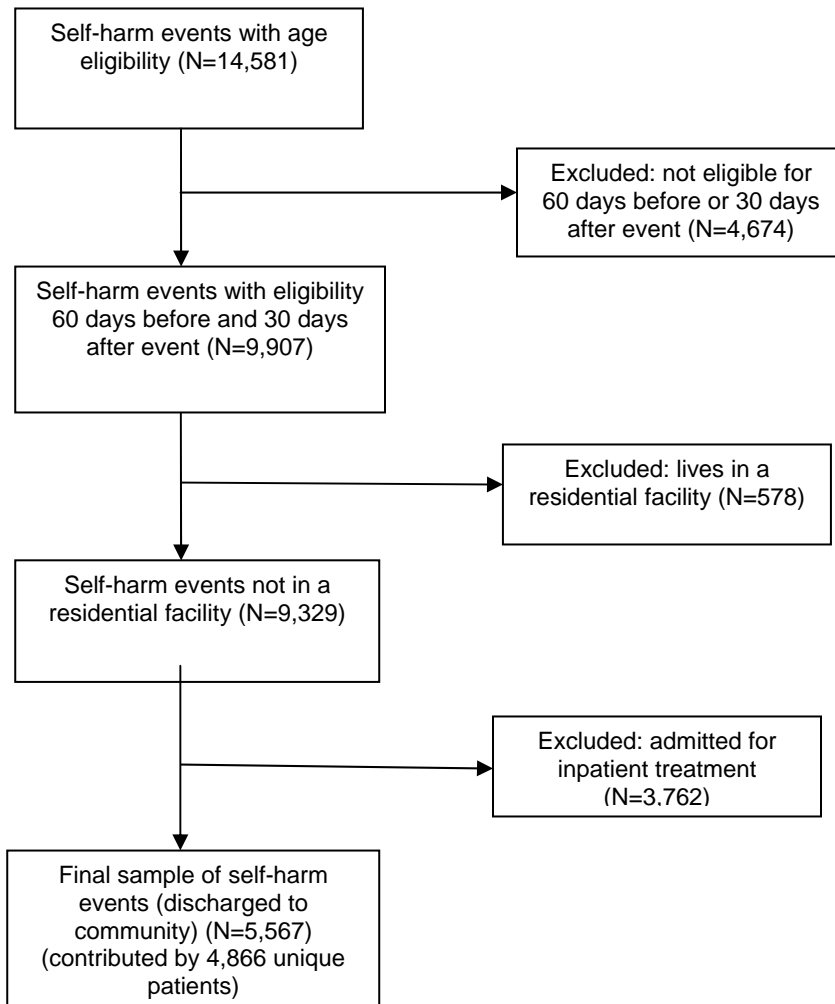

Supplement: 1442_ds001.pdf [file 1442_ds001.pdf]
